# Supplementary material
Source: PubMed Central journal article supplement (PMC1899836)

## Appendix A. Supplementary Data

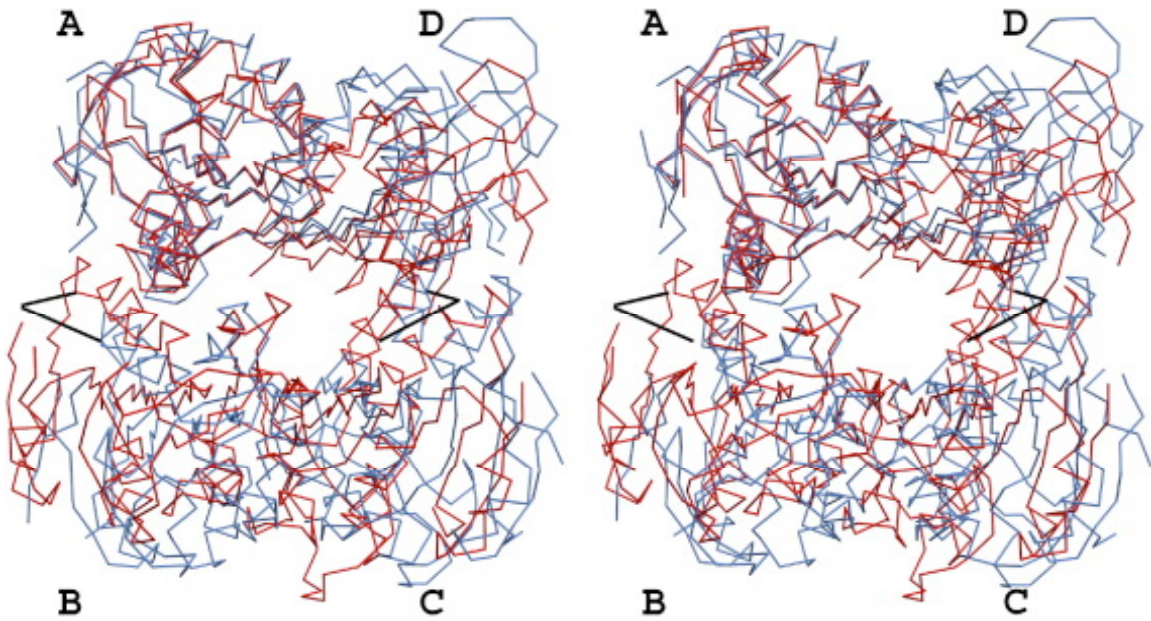

Supplementary Data Figure S1.

Supplement: NIHMS21620-supplement-SuppA.pdf [file NIHMS21620-supplement-SuppA.pdf]
